# Supplementary material for: Sex-Specific Associations between Gut Prevotellaceae and Host Genetics on Adiposity
Source: PubMed Central journal article supplement (PMC7356943; doi:10.3390/microorganisms8060938), 2020-06-22
Supplement: microorganisms-08-00938-s001.pdf [file microorganisms-08-00938-s001.pdf]

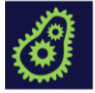

1 Supplementary materials

2 **Figure S1. A. Roc curve BMI classification random forest for predicting obese status as variable**  
3 **that identified the model. B. Roc curve GRS classification random forest for predicting high genetic**  
4 **risk score as variable that identified the model.**

5 A.

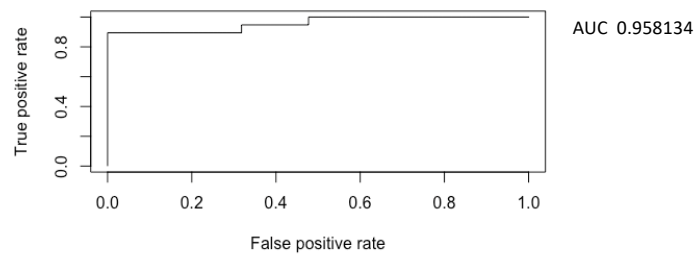

6

7 B.

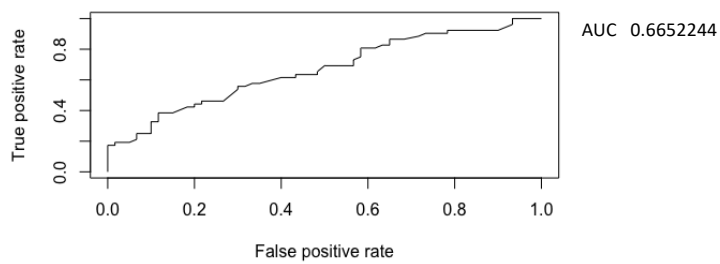

8

9

10

11

12

13

14

15

16

17 **Figure S2. Principal component analysis (PCA) scaling based on Euclidean distances.**

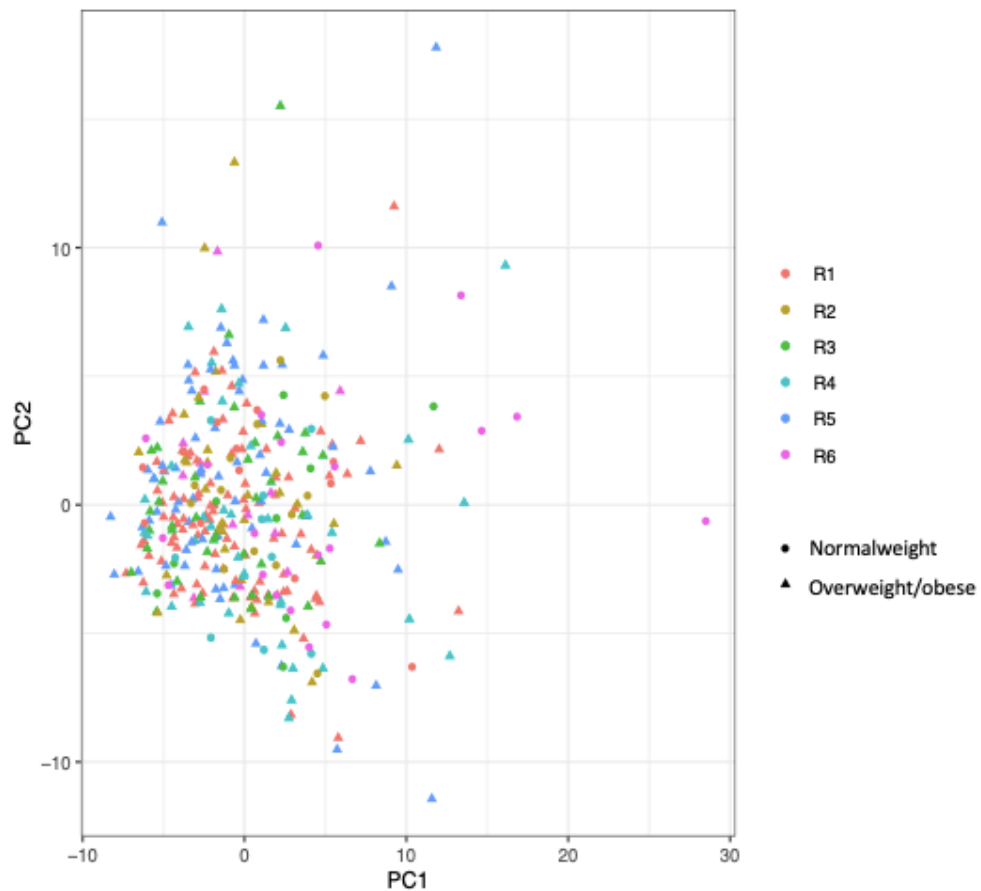

18

19 PCA plot showing the absence of batch effect. Different colors indicate different runs (R1-6) in  
20 sequencing, while different symbols represent sample types, triangle represent subjects with  
21 BMI>25kg/m<sup>2</sup> and circles represent subjects with BMI<24.9kg/m<sup>2</sup>. This plot demonstrated that  
22 grouping was not caused by batch effect in our samples.

23

24

25

26

27

28

29

30

31

32 **Table S1.** Genomic characteristics of the 95 obesity-predisposing SNPs.

| SNP <sup>a</sup>    | Gene <sup>b</sup> | Chromosome position <sup>c</sup> | Alleles |
|---------------------|-------------------|----------------------------------|---------|
| rs17024393          | <i>GNAT2</i>      | Chr1:110154688                   | T/C     |
| rs1801131           | <i>MTHFR</i>      | Chr1:11854476                    | T/G     |
| rs1801133           | <i>MTHFR</i>      | Chr1:11856378                    | G/A     |
| rs543874            | <i>SEC16B</i>     | Chr1:177889480                   | A/G     |
| rs2605100           | <i>LYPLAL1</i>    | Chr1:219644224                   | A/G     |
| rs4846567           | <i>LYPLAL1</i>    | Chr1:219750717                   | G/T     |
| rs3123554           | <i>CNR2</i>       | Chr1:24196401                    | A/G     |
| rs324420            | <i>FAAH</i>       | Chr1:46870761                    | C/A     |
| rs8179183/rs1805094 | <i>LEPR</i>       | Chr1:66075952                    | G/C     |
| rs2815752           | <i>NEGR1</i>      | Chr1:72812440                    | G/A     |
| rs519887            | <i>ABCB11</i>     | Chr2:169780885                   | T/C     |
| rs484066            | <i>ABCB11</i>     | Chr2:169782481                   | A/T     |
| rs569805            | <i>ABCB11</i>     | Chr2:169782880                   | A/T     |
| rs494874            | <i>ABCB11</i>     | Chr2:169789306                   | T/C     |
| rs2943641           | <i>IRS1</i>       | Chr2:227093745                   | T/C     |
| rs10182181          | <i>ADCY3</i>      | Chr2:25150296                    | A/G     |
| rs713586            | <i>ADCY3</i>      | Chr2:25158008                    | T/C     |
| rs2860323           | <i>TMEM18</i>     | Chr2:614210                      | A/G     |
| rs2867125           | <i>TMEM18</i>     | Chr2:622827                      | T/C     |
| rs13021737          | <i>TMEM18</i>     | Chr2:632348                      | A/G     |
| rs1801282           | <i>PPARG</i>      | Chr3:12393125                    | C/G     |
| rs2959272           | <i>PPARG</i>      | Chr3:12442833                    | T/G     |
| rs1386835           | <i>PPARG</i>      | Chr3:12450918                    | A/G     |
| rs709158            | <i>PPARG</i>      | Chr3:12463176                    | A/G     |
| rs1175540           | <i>PPARG</i>      | Chr3:12465243                    | C/A     |
| rs1175544           | <i>PPARG</i>      | Chr3:12467044                    | C/T     |
| rs1797912           | <i>PPARG</i>      | Chr3:12470239                    | A/C     |
| rs1516725           | <i>ETV5</i>       | Chr3:185824004                   | T/C     |
| rs9816226           | <i>ETV5</i>       | Chr3:185834499                   | A/T     |
| rs13107325          | <i>SLC39A8</i>    | Chr4:103188709                   | C/A/T   |
| rs1799883           | <i>FABP2</i>      | Chr4:120241902                   | T/C     |
| rs6536991           | <i>UCP1</i>       | Chr4:141481581                   | T/C     |
| rs12502572          | <i>UCP1</i>       | Chr4:141485134                   | G/A     |
| rs1800592           | <i>UCP1</i>       | Chr4:141493961                   | T/C     |
| rs8192678           | <i>PPARGC1A</i>   | Chr4:23815662                    | C/T     |
| rs10938397          | <i>GNPDA2</i>     | Chr4:45182527                    | A/G     |
| rs1801260           | <i>CLOCK</i>      | Chr4:56301369                    | A/G     |
| rs1440581           | <i>PPM1K</i>      | Chr4:89226422                    | T/C     |
| rs1042713           | <i>ADRB2</i>      | Chr5:148206440                   | G/A     |
| rs1042714           | <i>ADRB2</i>      | Chr5:148206473                   | G/C     |
| rs6861681           | <i>CPEB4</i>      | Chr5:173362458                   | G/A     |
| rs1800629           | <i>TNFA</i>       | Chr6:31543031                    | G/A     |
| rs206936            | <i>NUDT3</i>      | Chr6:34302869                    | A/G     |
| rs987237            | <i>TFAP2B</i>     | Chr6:50803050                    | A/G     |
| rs2207139           | <i>TFAP2B</i>     | Chr6:50845490                    | A/G     |
| rs7799039           | <i>LEP</i>        | Chr7:127878783                   | G/A     |
| rs4731426           | <i>LEP</i>        | Chr7:127882070                   | G/C     |
| rs2071045           | <i>LEP</i>        | Chr7:127892980                   | T/C     |
| rs1055144           | <i>NFE2L3</i>     | Chr7:25871109                    | C/T     |
| rs4994              | <i>ADRB3</i>      | Chr8:37823798                    | A/G     |
| rs1800544           | <i>ADRA2A</i>     | Chr10:112836503                  | G/C     |
| rs2419621           | <i>ACSL5</i>      | Chr10:114135013                  | C/T     |
| rs7903146           | <i>TCF7L2</i>     | Chr10:114758349                  | C/T     |
| rs12255372          | <i>TCF7L2</i>     | Chr10:114808902                  | G/T     |
| rs1800497           | <i>ANKK1</i>      | Chr11:113270828                  | G/A     |
| rs662799            | <i>APOA5</i>      | Chr11:116663707                  | G/A     |
| rs6265              | <i>BDNF</i>       | Chr11:27679916                   | C/T     |
| rs11030104          | <i>BDNF</i>       | Chr11:27684517                   | A/G     |
| rs10767664          | <i>BDNF</i>       | Chr11:27725986                   | T/A     |
| rs11605924          | <i>CRY2</i>       | Chr11:45873091                   | A/C     |

|            |                  |                |     |
|------------|------------------|----------------|-----|
| rs10838738 | <i>MTCH2</i>     | Chr11:47663049 | A/G |
| rs660339   | <i>UCP2</i>      | Chr11:73689104 | G/A |
| rs659366   | <i>UCP2</i>      | Chr11:73694754 | C/T |
| rs2075577  | <i>UCP3</i>      | Chr11:73715542 | G/A |
| rs2734827  | <i>UCP3</i>      | Chr11:73716277 | G/A |
| rs1685325  | <i>UCP3</i>      | Chr11:73717025 | T/C |
| rs2075576  | <i>UCP3</i>      | Chr11:73717121 | C/T |
| rs1800006  | <i>UCP3</i>      | Chr11:73717254 | A/G |
| rs1800849  | <i>UCP3</i>      | Chr11:73720165 | G/A |
| rs4929949  | <i>STK33</i>     | Chr11:8604593  | T/C |
| rs10830963 | <i>MTNR1B</i>    | Chr11:92708710 | C/G |
| rs4769873  | <i>ALOX5AP</i>   | Chr13:31312689 | C/T |
| rs1052700  | <i>PLIN1</i>     | Chr15:90208310 | A/T |
| rs894160   | <i>PLIN1</i>     | Chr15:90211823 | C/T |
| rs2289487  | <i>PLIN1</i>     | Chr15:90217096 | C/T |
| rs7498665  | <i>SH2B1</i>     | Chr16:28883241 | A/G |
| rs7359397  | <i>SH2B1</i>     | Chr16:28885659 | C/T |
| rs1558902  | <i>FTO</i>       | Chr16:53803574 | T/A |
| rs1121980  | <i>FTO</i>       | Chr16:53809247 | G/A |
| rs17817449 | <i>FTO</i>       | Chr16:53813367 | T/G |
| rs8050136  | <i>FTO</i>       | Chr16:53816275 | C/A |
| rs3751812  | <i>FTO</i>       | chr16:53818460 | G/T |
| rs9939609  | <i>FTO</i>       | Chr16:53820527 | T/A |
| rs12452844 | <i>AANAT</i>     | Chr17:74459243 | G/A |
| rs1805081  | <i>NPC1</i>      | Chr18:21140432 | T/C |
| rs6567160  | <i>MC4R</i>      | Chr18:57829135 | T/C |
| rs571312   | <i>MC4R</i>      | Chr18:57839769 | C/A |
| rs17782313 | <i>MC4R</i>      | Chr18:57851097 | T/C |
| rs17066866 | <i>MC4R</i>      | Chr18:58055619 | A/T |
| rs17069904 | <i>TNFRSF11A</i> | Chr18:60032949 | G/A |
| rs2287019  | <i>QPCTL</i>     | Chr19:46202172 | C/T |
| rs6013029  | <i>CTNBL1</i>    | Chr20:36399580 | G/T |
| rs6123837  | <i>GNAS</i>      | Chr20:57465571 | G/A |
| rs3813929  | <i>HTR2C</i>     | ChrX:113818520 | C/T |
| rs11091046 | <i>AGTR2</i>     | ChrX:115305126 | A/C |

33 <sup>a</sup> dbSNP reference, <sup>b</sup> gene assigned by dbSNP and <sup>c</sup> GRCh37, p13 assemb

34

35

36

37

38

39

40

41

42

43

44 **Table S2.** Mean of abundance for each bacterial taxa obtained from LEfSe analysis between  
 45 normalweight and overweight+obese subjects.

| TAXA NAME                              | Mean of abundance in normalweight | Mean of abundance in overweight+obese |
|----------------------------------------|-----------------------------------|---------------------------------------|
|                                        | subjects                          | subjects                              |
| Actinobacteria                         | 10.6 ± 0.2                        | 9.8 ± 0.1                             |
| Bacteroidetes                          | 16.8 ± 0.05                       | 16.9 ± 0.02                           |
| Firmicutes                             | 16.1 ± 0.7                        | 15.8 ± 0.03                           |
| Actinobacteria (class)                 | 10.6 ± 0.2                        | 9.7 ± 0.1                             |
| Bacteroidia                            | 16.8 ± 0.05                       | 17.0 ± 0.02                           |
| Clostridia                             | 15.8 ± 0.1                        | 15.4 ± 0.05                           |
| Negativicutes                          | 11.4 ± 0.2                        | 11.8 ± 0.08                           |
| Aeromonadales                          | 0.9 ± 0.2                         | 1.7 ± 0.2                             |
| Bacteroidales                          | 16.8 ± 0.05                       | 17.0 ± 0.02                           |
| Caulobacteriales                       | 0.3 ± 0.1                         | 0.6 ± 0.06                            |
| Clostridiales                          | 15.8 ± 0.1                        | 15.4 ± 0.05                           |
| Coriobacteriales                       | 9.0 ± 0.2                         | 8.14 ± 0.09                           |
| Selenomonadales                        | 11.4 ± 0.2                        | 11.8 ± 0.09                           |
| Sphingomonadales                       | 0.17 ± 0.08                       | 0.4 ± 0.04                            |
| Aerococcaceae                          | 0.1 ± 0.07                        | 0.4 ± 0.05                            |
| Catabacteriaceae                       | 5.7 ± 0.4                         | 4.3 ± 0.2                             |
| Christensenellaceae                    | 8.0 ± 0.4                         | 6.9 ± 0.2                             |
| Clostridiales FamilyXIII_IncertaeSedis | 0.06 ± 0.03                       | 0.4 ± 0.06                            |
| Coriobacteriaceae                      | 9.0 ± 0.2                         | 8.1 ± 0.1                             |
| Lactobacillaceae                       | 2.5 ± 0.3                         | 3.7 ± 0.2                             |
| Leuconostocaceae                       | 2.0 ± 0.2                         | 2.4 ± 0.2                             |
| Micrococcaceae                         | 1.9 ± 0.2                         | 1.5 ± 0.1                             |
| Oscillospiraceae                       | 12.9 ± 0.2                        | 12.4 ± 0.1                            |
| Prevotellaceae                         | 11.15 ± 0.5                       | 12.7 ± 0.2                            |
| Ruminococcaceae                        | 14.4 ± 0.1                        | 14.0 ± 0.1                            |
| Sphingomonadaceae                      | 0.2 ± 0.07                        | 0.4 ± 0.04                            |
| Succinivibrionaceae                    | 0.8 ± 0.2                         | 1.7 ± 0.2                             |
| Unclassified_Clostridiales             | 1.8 ± 0.4                         | 2.7 ± 0.2                             |

46 Values correspond to the mean ± SEM.

47

48

49

50

51

52

53

54

55

56

57

58 **Table S3.** Mean of abundance for each bacterial taxa obtained from LEfSe analysis between high-GRS  
 59 and low-GRS subjects.

| TAXA NAME             | Mean of abundance in high GRS subjects | Mean of abundance in low GRS subjects |
|-----------------------|----------------------------------------|---------------------------------------|
| Bacteroides           | 16.0 ± 0.06                            | 16.2 ± 0.05                           |
| Caulobacterales       | 0.6 ± 0.08                             | 0.4 ± 0.06                            |
| Bacteroidaceae        | 16.0 ± 0.06                            | 16.2 ± 0.05                           |
| Caulobacteraceae      | 0.6 ± 0.08                             | 0.4 ± 0.07                            |
| Leuconostocaceae      | 0.8 ± 0.1                              | 0.5 ± 0.07                            |
| Peptostreptococcaceae | 8.0 ± 0.1                              | 8.4 ± 0.1                             |
| Prevotellaceae        | 13.0 ± 0.3                             | 12.0 ± 0.2                            |
| Rikenellaceae         | 12.1 ± 0.1                             | 12.5 ± 0.1                            |
| Acidaminococcus       | 3.5 ± 0.3                              | 2.8 ± 0.2                             |
| Actinomyces           | 1.5 ± 0.1                              | 1.3 ± 0.09                            |
| Alistipes             | 12.1 ± 0.1                             | 12.5 ± 0.1                            |
| Barnesiella           | 6.4 ± 0.3                              | 7.3 ± 0.2                             |
| Cellulostiyicum       | 0.09 ± 0.04                            | 0.5 ± 0.1                             |
| Citrobacter           | 0.6 ± 0.1                              | 1.0 ± 0.2                             |
| Prevotella            | 11.8 ± 0.3                             | 10.5 ± 0.3                            |
| Romboutsia            | 8.0 ± 0.1                              | 8.4 ± 0.1                             |
| Weisella              | 0.6 ± 0.1                              | 0.3 ± 0.07                            |

60 Values correspond to the mean ± SEM.

61
